# Supplementary material
Source: HighWire-hosted journal article supplement (https://jnm.snmjournals.org/highwire/filestream/103714/field_highwire_adjunct_files/0/261594_Supplemental_Data.pdf)
Supplement: 261594_Supplemental_Data.pdf [file 261594_Supplemental_Data.pdf]

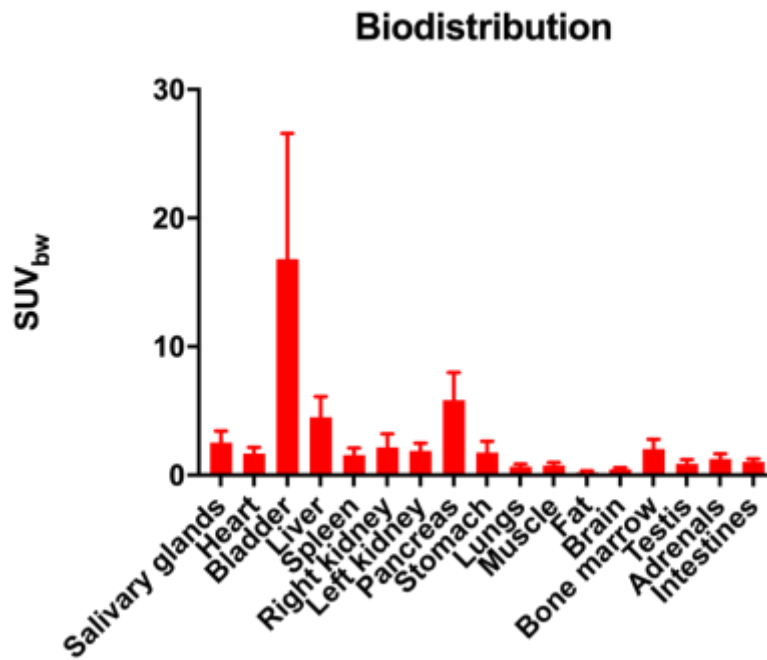

**Supplemental Figure 1:** Whole-body biodistribution of  $^{11}\text{C}$ -glutamine uptake in normal tissues. The standard uptake value (SUV), normalizing by body weight (bw), is plotted for 1-hour post-injection.

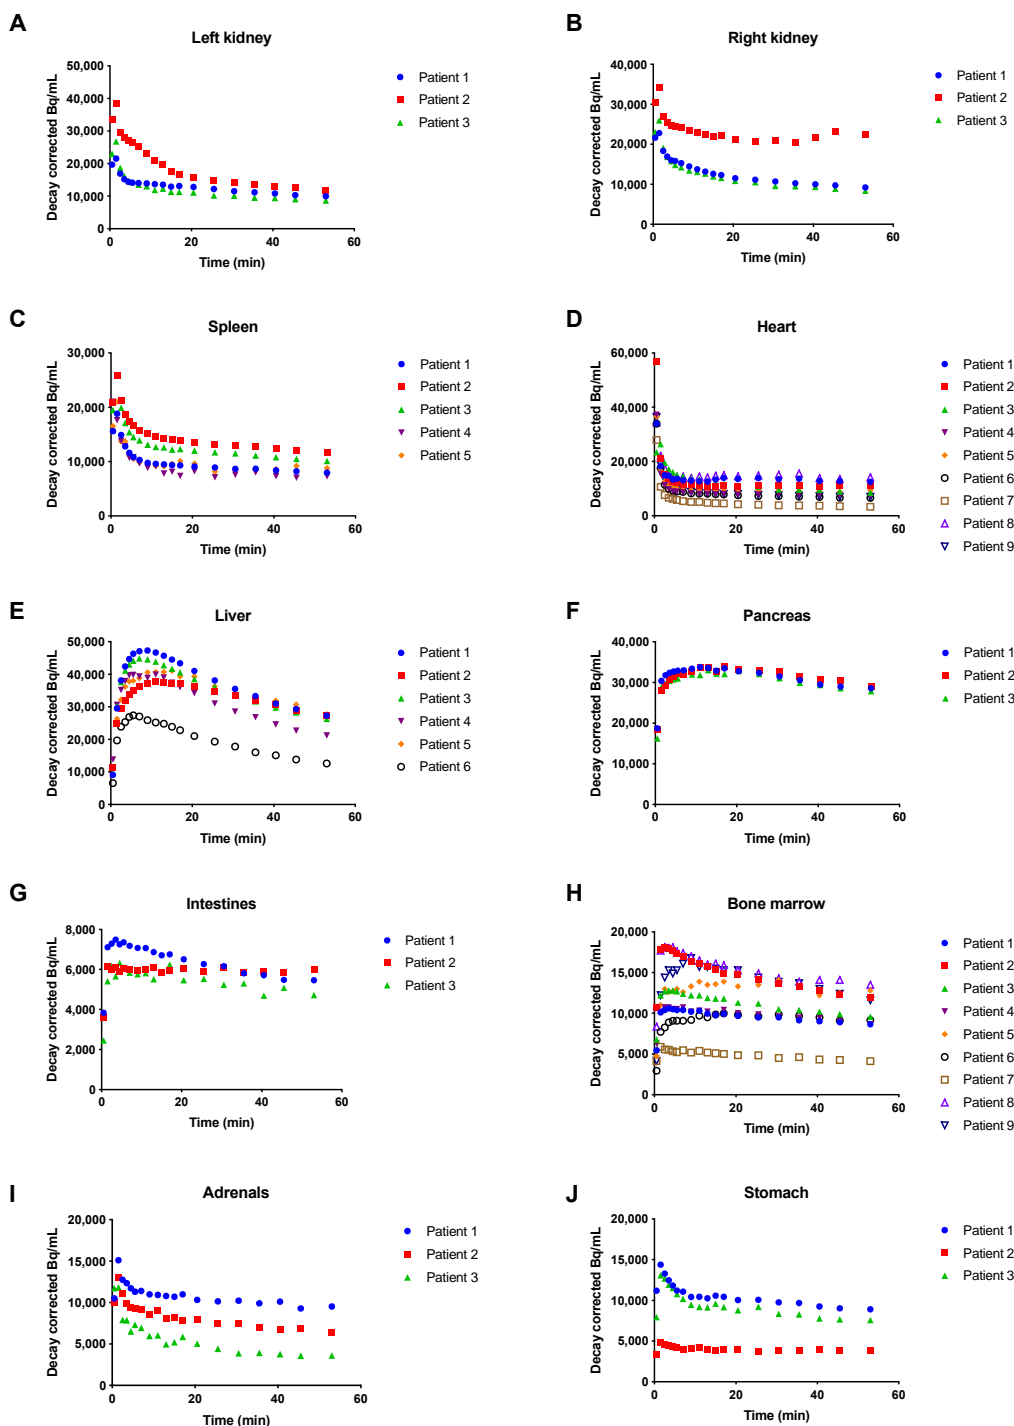

**Supplemental Figure 2:** Dynamic PET analysis of  $^{11}\text{C}$ -glutamine uptake in normal tissues. The activity concentration (Bq/mL) decay-corrected to the time of injection is plotted over time for each organ. Shown are data for (A) Left kidney, (B) Right kidney, (C) Spleen, (D) Heart, (E) Liver, (F) Pancreas, (G) Intestines, (H) Bone marrow, (I) Adrenals, and (J) Stomach.

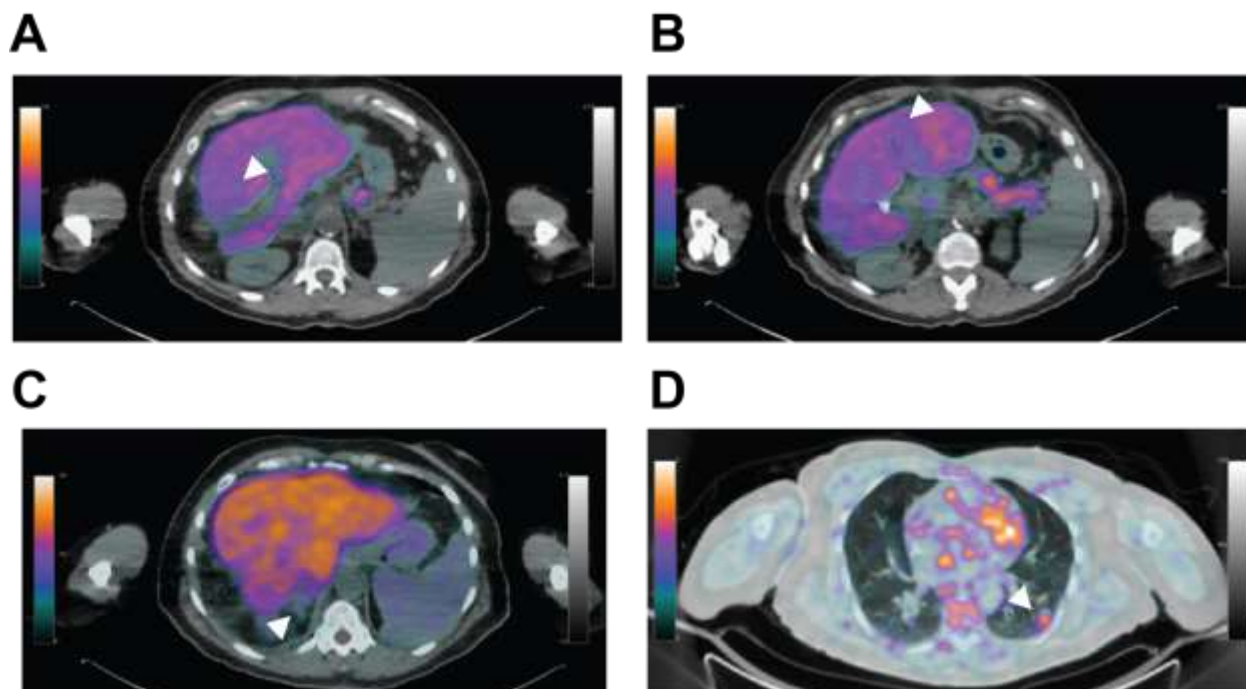

**Supplemental Figure 3:**  $^{11}\text{C}$ -glutamine tumor imaging in a patient with metastatic colorectal cancer. Axial  $^{11}\text{C}$ -glutamine PET/CT fusion images corresponding to two liver lesions (**A** and **B**), an adrenal mass (**C**), and a lung nodule (**D**). White arrowheads point to the lesions. The lesion-to-blood pool ratios from the whole-body scan were 5.40 (**A**), 5.11 (**B**), 3.50 (**C**), and 1.93 (**D**). The lesion-to-liver ratios from the whole-body scan were 1.19 and 1.13 for **A** and **B**, respectively.

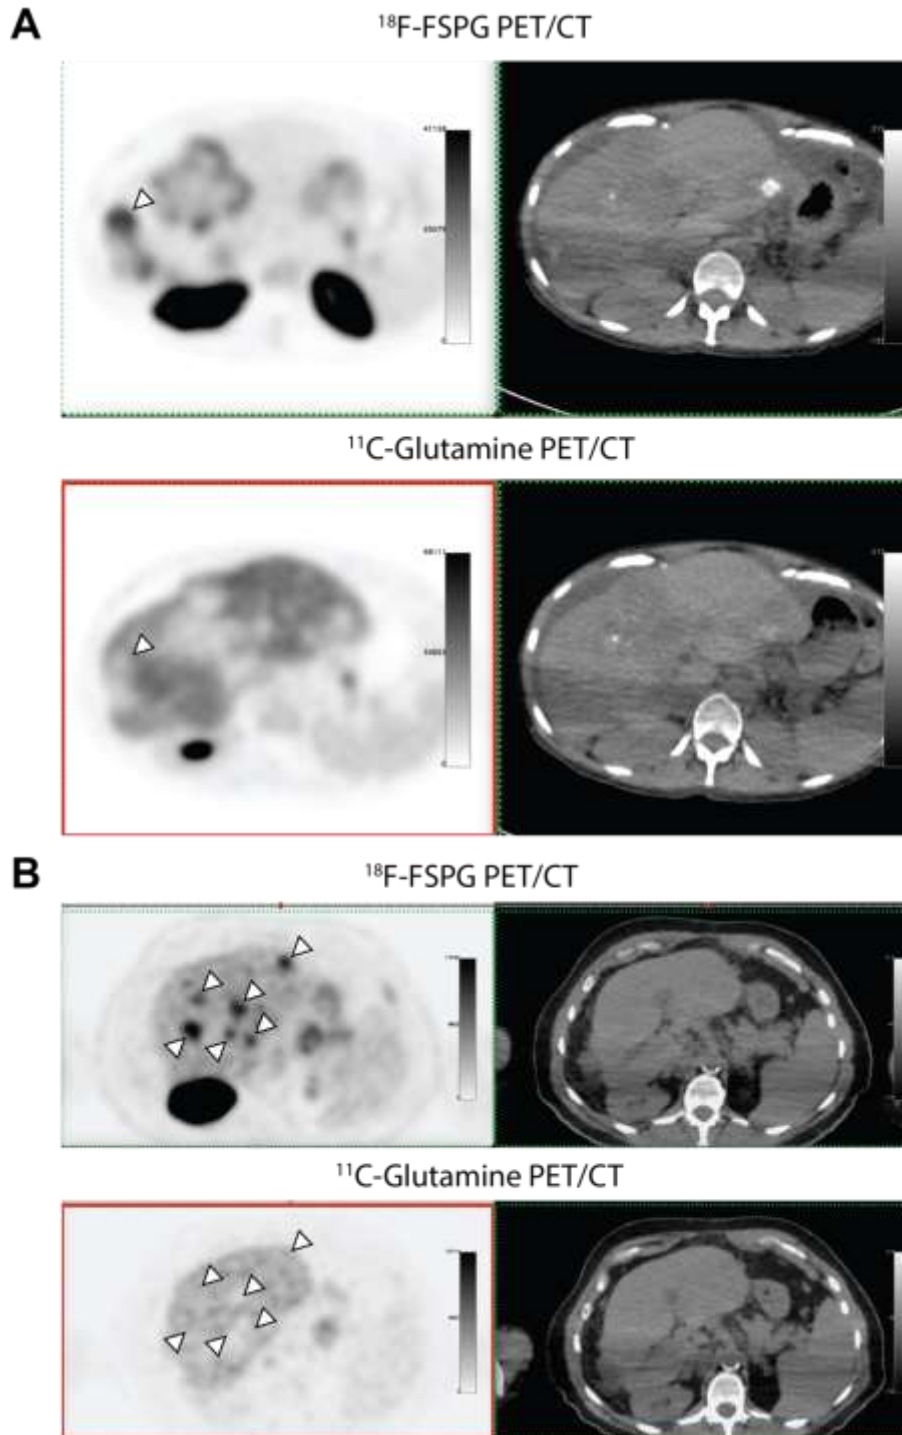

**Supplemental Figure 4:**  $^{11}\text{C}$ -glutamine negative tumors in patients with metastatic colorectal cancer.  $^{18}\text{F}$ -FSPG is an investigational PET radiotracer being evaluated for tumor imaging (50,51). Axial  $^{18}\text{F}$ -FSPG PET images with corresponding CTs (upper images) show (A) a right lateral liver lesion and (B) multiple hepatic metastases. The corresponding locations on axial  $^{11}\text{C}$ -glutamine PET images (lower images) demonstrate a lack of tumor uptake. White arrowheads point to the lesions.
